# Supplementary material for: Psychometric Analysis and Contribution to the Evaluation of the Exams-Related Emotions Scale in Primary and Secondary School Students
Source: MDPI journal article supplement (doi:10.3390/ijerph19116770), 2022-06-01
Supplement: s1 [file s1]

### Emociones Relacionadas con los Exámenes (Mendo y León, 2020)

Hacer exámenes puede producir diferentes sentimientos. Este cuestionario hace referencia a las emociones que puedes experimentar cuando realizas exámenes.

Lee cuidadosamente y **Marca con una equis (X)** el **número** que indica la frecuencia con la que experimentas aquello que describe cada pregunta.

| 1                                                                                                                                                                              | 2          | 3       | 4            | 5       |   |   |   |
|--------------------------------------------------------------------------------------------------------------------------------------------------------------------------------|------------|---------|--------------|---------|---|---|---|
| NUNCA                                                                                                                                                                          | CASI NUNCA | A VECES | CASI SIEMPRE | SIEMPRE |   |   |   |
| Los siguientes ítems se refieren a los sentimientos que puedes experimentar <b>ANTES</b> de hacer un examen. Indica cómo te sientes generalmente antes de un examen.           |            |         |              |         |   |   |   |
| Antes del examen me siento nervioso e inquieto.                                                                                                                                |            |         | 1            | 2       | 3 | 4 | 5 |
| Me deprimó porque siento que no tengo mucha esperanza de aprobar el examen.                                                                                                    |            |         | 1            | 2       | 3 | 4 | 5 |
| Pienso con optimismo en el examen.                                                                                                                                             |            |         | 1            | 2       | 3 | 4 | 5 |
| No puedo ni pensar en lo vergonzoso que sería reprobado el examen.                                                                                                             |            |         | 1            | 2       | 3 | 4 | 5 |
| Me preocupa si habré estudiado lo suficiente.                                                                                                                                  |            |         | 1            | 2       | 3 | 4 | 5 |
| Como disfruto al preparar los exámenes estoy motivado para hacer más de lo necesario.                                                                                          |            |         | 1            | 2       | 3 | 4 | 5 |
| Estoy tan orgulloso de cómo me preparé que quiero comenzar el examen ya mismo.                                                                                                 |            |         | 1            | 2       | 3 | 4 | 5 |
| Me pongo tan nervioso que desearía poder faltar al examen.                                                                                                                     |            |         | 1            | 2       | 3 | 4 | 5 |
| Preferiría no presentarme al examen porque he perdido todas las esperanzas.                                                                                                    |            |         | 1            | 2       | 3 | 4 | 5 |
| Los siguientes ítems se refieren a los sentimientos que puedes experimentar <b>DURANTE</b> el examen. Indica cómo te sientes generalmente mientras haces el examen.            |            |         |              |         |   |   |   |
| Estoy muy seguro.                                                                                                                                                              |            |         | 1            | 2       | 3 | 4 | 5 |
| Me enoja.                                                                                                                                                                      |            |         | 1            | 2       | 3 | 4 | 5 |
| Estoy muy nervioso.                                                                                                                                                            |            |         | 1            | 2       | 3 | 4 | 5 |
| Me siento avergonzado.                                                                                                                                                         |            |         | 1            | 2       | 3 | 4 | 5 |
| Estoy contento de poder afrontar el examen.                                                                                                                                    |            |         | 1            | 2       | 3 | 4 | 5 |
| Creo que puedo estar orgulloso de mis conocimientos.                                                                                                                           |            |         | 1            | 2       | 3 | 4 | 5 |
| Me parece que las preguntas son injustas.                                                                                                                                      |            |         | 1            | 2       | 3 | 4 | 5 |
| Me preocupa si aprobaré el examen.                                                                                                                                             |            |         | 1            | 2       | 3 | 4 | 5 |
| Empiezo a pensar que por mucho que me esfuerce nunca aprobaré el examen.                                                                                                       |            |         | 1            | 2       | 3 | 4 | 5 |
| Me da vergüenza lo mal que me preparé.                                                                                                                                         |            |         | 1            | 2       | 3 | 4 | 5 |
| Como espero aprobar estoy motivado para esforzarme mucho.                                                                                                                      |            |         | 1            | 2       | 3 | 4 | 5 |
| Tengo ganas de abandonar.                                                                                                                                                      |            |         | 1            | 2       | 3 | 4 | 5 |
| Al comenzar el examen mi corazón empieza a acelerarse.                                                                                                                         |            |         | 1            | 2       | 3 | 4 | 5 |
| Me tiemblan las manos.                                                                                                                                                         |            |         | 1            | 2       | 3 | 4 | 5 |
| Me siento tan resignado que no tengo energía.                                                                                                                                  |            |         | 1            | 2       | 3 | 4 | 5 |
| Los siguientes ítems se refieren a los sentimientos que puedes experimentar <b>DESPUÉS</b> de hacer el examen. Indica cómo te sientes generalmente después de hacer un examen. |            |         |              |         |   |   |   |
| Estoy muy satisfecho conmigo mismo.                                                                                                                                            |            |         | 1            | 2       | 3 | 4 | 5 |
| Me siento muy aliviado.                                                                                                                                                        |            |         | 1            | 2       | 3 | 4 | 5 |
| Siento vergüenza.                                                                                                                                                              |            |         | 1            | 2       | 3 | 4 | 5 |
| Me avergüenzan mis notas.                                                                                                                                                      |            |         | 1            | 2       | 3 | 4 | 5 |
| Cuando saco una mala nota quisiera no tener que volver a mirar a la cara a mi profesor.                                                                                        |            |         | 1            | 2       | 3 | 4 | 5 |
| Desearía poder retar al profesor.                                                                                                                                              |            |         | 1            | 2       | 3 | 4 | 5 |

|                                                                  |   |   |   |   |   |
|------------------------------------------------------------------|---|---|---|---|---|
| Los nervios en el estómago desaparecen.                          | 1 | 2 | 3 | 4 | 5 |
| Estoy rebosante de entusiasmo.                                   | 1 | 2 | 3 | 4 | 5 |
| Después del examen estoy tan orgulloso que me siento más grande. | 1 | 2 | 3 | 4 | 5 |
| Se me sube la sangre a la cabeza.                                | 1 | 2 | 3 | 4 | 5 |
| Por fin puedo volver a respirar tranquilo.                       | 1 | 2 | 3 | 4 | 5 |
