# Supplementary material for: Psychometric Analysis and Contribution to the Evaluation of the Exams-Related Emotions Scale in Primary and Secondary School Students
Source: Int J Environ Res Public Health. 2022 Jun 1;19(11):6770. doi: 10.3390/ijerph19116770 (PMC9180762; doi:10.3390/ijerph19116770)
Supplement: Supplementary file 1 [file ijerph-19-06770-s001.zip]

Archive with 4 entries (4 files):
- Cuestionario EEE.pdf
- __MACOSX/._Cuestionario EEE.pdf
- EES.pdf
- __MACOSX/._EES.pdf
